# Supplementary material for: Impact of Plan-Level Access Restrictions on Effectiveness of Biologics Among Patients with Rheumatoid or Psoriatic Arthritis
Source: PubMed Central journal article supplement — Pharmacoecon Open. 2019 Jun 8;4(1):105–17. doi: 10.1007/s41669-019-0152-1 (PMC7018889; doi:10.1007/s41669-019-0152-1), 2019-06-08
Supplement: 41669_2019_152_MOESM1_ESM.pdf [file 41669_2019_152_MOESM1_ESM.pdf]

## Impact of plan-level access restrictions on adherence and effectiveness of biologics among patients with rheumatoid or psoriatic arthritis

Pharmacoeconomics

Natalie Boytsov, Xiang Zhang, Kristin A. Evans, Barbara H. Johnson

Corresponding Author: Natalie Boytsov, Eli Lilly and Company, boytsov\_natalie\_n@lilly.com

**Online Resource 1:** ICD-9-CM and ICD-10-CM Diagnosis codes for RA and PsA

| ICD-9 Dx Code  | Description                                                      | Condition           |
|----------------|------------------------------------------------------------------|---------------------|
| 696.0          | Psoriatic arthropathy                                            | PSORIATIC ARTHRITIS |
| 714.0          | Rheumatoid arthritis                                             | RA                  |
| 714.1          | Felty's syndrome                                                 | RA                  |
| 714.2          | Other rheumatoid arthritis with visceral or systemic involvement | RA                  |
|                |                                                                  |                     |
| ICD-10 Dx Code | Description                                                      | Condition           |
| L4050          | Arthropathic psoriasis, unspecified                              | PSORIATIC ARTHRITIS |
| L4051          | Distal interphalangeal psoriatic arthropathy                     | PSORIATIC ARTHRITIS |
| L4052          | Psoriatic arthritis mutilans                                     | PSORIATIC ARTHRITIS |
| L4053          | Psoriatic spondylitis                                            | PSORIATIC ARTHRITIS |
| L4054          | Psoriatic juvenile arthropathy                                   | PSORIATIC ARTHRITIS |
| L4059          | Other psoriatic arthropathy                                      | PSORIATIC ARTHRITIS |
| M0500          | Felty's syndrome, unspecified site                               | RA                  |
| M05011         | Felty's syndrome, right shoulder                                 | RA                  |
| M05012         | Felty's syndrome, left shoulder                                  | RA                  |
| M05019         | Felty's syndrome, unspecified shoulder                           | RA                  |
| M05021         | Felty's syndrome, right elbow                                    | RA                  |
| M05022         | Felty's syndrome, left elbow                                     | RA                  |
| M05029         | Felty's syndrome, unspecified elbow                              | RA                  |
| M05031         | Felty's syndrome, right wrist                                    | RA                  |
| M05032         | Felty's syndrome, left wrist                                     | RA                  |
| M05039         | Felty's syndrome, unspecified wrist                              | RA                  |
| M05041         | Felty's syndrome, right hand                                     | RA                  |
| M05042         | Felty's syndrome, left hand                                      | RA                  |

|                       |                                                                           |                  |
|-----------------------|---------------------------------------------------------------------------|------------------|
| M05049                | Felty's syndrome, unspecified hand                                        | RA               |
| M05051                | Felty's syndrome, right hip                                               | RA               |
| M05052                | Felty's syndrome, left hip                                                | RA               |
| M05059                | Felty's syndrome, unspecified hip                                         | RA               |
| <b>ICD-10 Dx Code</b> | <b>Description</b>                                                        | <b>Condition</b> |
| M05061                | Felty's syndrome, right knee                                              | RA               |
| M05062                | Felty's syndrome, left knee                                               | RA               |
| M05069                | Felty's syndrome, unspecified knee                                        | RA               |
| M05071                | Felty's syndrome, right ankle and foot                                    | RA               |
| M05072                | Felty's syndrome, left ankle and foot                                     | RA               |
| M05079                | Felty's syndrome, unspecified ankle and foot                              | RA               |
| M0509                 | Felty's syndrome, multiple sites                                          | RA               |
| M0510                 | Rheumatoid lung disease with rheumatoid arthritis of unspecified site     | RA               |
| M05111                | Rheumatoid lung disease with rheumatoid arthritis of right shoulder       | RA               |
| M05112                | Rheumatoid lung disease with rheumatoid arthritis of left shoulder        | RA               |
| M05119                | Rheumatoid lung disease with rheumatoid arthritis of unspecified shoulder | RA               |
| M05121                | Rheumatoid lung disease with rheumatoid arthritis of right elbow          | RA               |
| M05122                | Rheumatoid lung disease with rheumatoid arthritis of left elbow           | RA               |
| M05129                | Rheumatoid lung disease with rheumatoid arthritis of unspecified elbow    | RA               |
| M05131                | Rheumatoid lung disease with rheumatoid arthritis of right wrist          | RA               |
| M05132                | Rheumatoid lung disease with rheumatoid arthritis of left wrist           | RA               |
| M05139                | Rheumatoid lung disease with rheumatoid arthritis of unspecified wrist    | RA               |
| M05141                | Rheumatoid lung disease with rheumatoid arthritis of right hand           | RA               |
| M05142                | Rheumatoid lung disease with rheumatoid arthritis of left hand            | RA               |
| M05149                | Rheumatoid lung disease with rheumatoid arthritis of unspecified hand     | RA               |
| M05151                | Rheumatoid lung disease with rheumatoid arthritis of right hip            | RA               |
| M05152                | Rheumatoid lung disease with rheumatoid arthritis of left hip             | RA               |
| M05159                | Rheumatoid lung disease with rheumatoid arthritis of unspecified hip      | RA               |
| M05161                | Rheumatoid lung disease with rheumatoid arthritis of right knee           | RA               |

|                       |                                                                                 |                  |
|-----------------------|---------------------------------------------------------------------------------|------------------|
| M05162                | Rheumatoid lung disease with rheumatoid arthritis of left knee                  | RA               |
| M05169                | Rheumatoid lung disease with rheumatoid arthritis of unspecified knee           | RA               |
| <b>ICD-10 Dx Code</b> | <b>Description</b>                                                              | <b>Condition</b> |
| M05171                | Rheumatoid lung disease with rheumatoid arthritis of right ankle and foot       | RA               |
| M05172                | Rheumatoid lung disease with rheumatoid arthritis of left ankle and foot        | RA               |
| M05179                | Rheumatoid lung disease with rheumatoid arthritis of unspecified ankle and foot | RA               |
| M0519                 | Rheumatoid lung disease with rheumatoid arthritis of multiple sites             | RA               |
| M0520                 | Rheumatoid vasculitis with rheumatoid arthritis of unspecified site             | RA               |
| M05211                | Rheumatoid vasculitis with rheumatoid arthritis of right shoulder               | RA               |
| M05212                | Rheumatoid vasculitis with rheumatoid arthritis of left shoulder                | RA               |
| M05219                | Rheumatoid vasculitis with rheumatoid arthritis of unspecified shoulder         | RA               |
| M05221                | Rheumatoid vasculitis with rheumatoid arthritis of right elbow                  | RA               |
| M05222                | Rheumatoid vasculitis with rheumatoid arthritis of left elbow                   | RA               |
| M05229                | Rheumatoid vasculitis with rheumatoid arthritis of unspecified elbow            | RA               |
| M05231                | Rheumatoid vasculitis with rheumatoid arthritis of right wrist                  | RA               |
| M05232                | Rheumatoid vasculitis with rheumatoid arthritis of left wrist                   | RA               |
| M05239                | Rheumatoid vasculitis with rheumatoid arthritis of unspecified wrist            | RA               |
| M05241                | Rheumatoid vasculitis with rheumatoid arthritis of right hand                   | RA               |
| M05242                | Rheumatoid vasculitis with rheumatoid arthritis of left hand                    | RA               |
| M05249                | Rheumatoid vasculitis with rheumatoid arthritis of unspecified hand             | RA               |
| M05251                | Rheumatoid vasculitis with rheumatoid arthritis of right hip                    | RA               |
| M05252                | Rheumatoid vasculitis with rheumatoid arthritis of left hip                     | RA               |
| M05259                | Rheumatoid vasculitis with rheumatoid arthritis of unspecified hip              | RA               |
| M05261                | Rheumatoid vasculitis with rheumatoid arthritis of right knee                   | RA               |
| M05262                | Rheumatoid vasculitis with rheumatoid arthritis of left knee                    | RA               |
| M05269                | Rheumatoid vasculitis with rheumatoid arthritis of unspecified knee             | RA               |
|                       |                                                                                 |                  |

| <b>ICD-10 Dx Code</b> | <b>Description</b>                                                            | <b>Condition</b> |
|-----------------------|-------------------------------------------------------------------------------|------------------|
| M05271                | Rheumatoid vasculitis with rheumatoid arthritis of right ankle and foot       | RA               |
| M05272                | Rheumatoid vasculitis with rheumatoid arthritis of left ankle and foot        | RA               |
| M05279                | Rheumatoid vasculitis with rheumatoid arthritis of unspecified ankle and foot | RA               |
| M0529                 | Rheumatoid vasculitis with rheumatoid arthritis of multiple sites             | RA               |
| M0530                 | Rheumatoid heart disease with rheumatoid arthritis of unspecified site        | RA               |
| M05311                | Rheumatoid heart disease with rheumatoid arthritis of right shoulder          | RA               |
| M05312                | Rheumatoid heart disease with rheumatoid arthritis of left shoulder           | RA               |
| M05319                | Rheumatoid heart disease with rheumatoid arthritis of unspecified shoulder    | RA               |
| M05321                | Rheumatoid heart disease with rheumatoid arthritis of right elbow             | RA               |
| M05322                | Rheumatoid heart disease with rheumatoid arthritis of left elbow              | RA               |
| M05329                | Rheumatoid heart disease with rheumatoid arthritis of unspecified elbow       | RA               |
| M05331                | Rheumatoid heart disease with rheumatoid arthritis of right wrist             | RA               |
| M05332                | Rheumatoid heart disease with rheumatoid arthritis of left wrist              | RA               |
| M05339                | Rheumatoid heart disease with rheumatoid arthritis of unspecified wrist       | RA               |
| M05341                | Rheumatoid heart disease with rheumatoid arthritis of right hand              | RA               |
| M05342                | Rheumatoid heart disease with rheumatoid arthritis of left hand               | RA               |
| M05349                | Rheumatoid heart disease with rheumatoid arthritis of unspecified hand        | RA               |
| M05351                | Rheumatoid heart disease with rheumatoid arthritis of right hip               | RA               |
| M05352                | Rheumatoid heart disease with rheumatoid arthritis of left hip                | RA               |
| M05359                | Rheumatoid heart disease with rheumatoid arthritis of unspecified hip         | RA               |
| M05361                | Rheumatoid heart disease with rheumatoid arthritis of right knee              | RA               |
| M05362                | Rheumatoid heart disease with rheumatoid arthritis of left knee               | RA               |
| M05369                | Rheumatoid heart disease with rheumatoid arthritis of unspecified knee        | RA               |
| M05371                | Rheumatoid heart disease with rheumatoid arthritis of right ankle and foot    | RA               |

|        |                                                                                  |    |
|--------|----------------------------------------------------------------------------------|----|
| M05372 | Rheumatoid heart disease with rheumatoid arthritis of left ankle and foot        | RA |
| M05379 | Rheumatoid heart disease with rheumatoid arthritis of unspecified ankle and foot | RA |
| M0539  | Rheumatoid heart disease with rheumatoid arthritis of multiple sites             | RA |
| M0540  | Rheumatoid myopathy with rheumatoid arthritis of unspecified site                | RA |
| M05411 | Rheumatoid myopathy with rheumatoid arthritis of right shoulder                  | RA |
| M05412 | Rheumatoid myopathy with rheumatoid arthritis of left shoulder                   | RA |
| M05419 | Rheumatoid myopathy with rheumatoid arthritis of unspecified shoulder            | RA |
| M05421 | Rheumatoid myopathy with rheumatoid arthritis of right elbow                     | RA |
| M05422 | Rheumatoid myopathy with rheumatoid arthritis of left elbow                      | RA |
| M05429 | Rheumatoid myopathy with rheumatoid arthritis of unspecified elbow               | RA |
| M05431 | Rheumatoid myopathy with rheumatoid arthritis of right wrist                     | RA |
| M05432 | Rheumatoid myopathy with rheumatoid arthritis of left wrist                      | RA |
| M05439 | Rheumatoid myopathy with rheumatoid arthritis of unspecified wrist               | RA |
| M05441 | Rheumatoid myopathy with rheumatoid arthritis of right hand                      | RA |
| M05442 | Rheumatoid myopathy with rheumatoid arthritis of left hand                       | RA |
| M05449 | Rheumatoid myopathy with rheumatoid arthritis of unspecified hand                | RA |
| M05451 | Rheumatoid myopathy with rheumatoid arthritis of right hip                       | RA |
| M05452 | Rheumatoid myopathy with rheumatoid arthritis of left hip                        | RA |
| M05459 | Rheumatoid myopathy with rheumatoid arthritis of unspecified hip                 | RA |
| M05461 | Rheumatoid myopathy with rheumatoid arthritis of right knee                      | RA |
| M05462 | Rheumatoid myopathy with rheumatoid arthritis of left knee                       | RA |
| M05469 | Rheumatoid myopathy with rheumatoid arthritis of unspecified knee                | RA |
| M05471 | Rheumatoid myopathy with rheumatoid arthritis of right ankle and foot            | RA |
| M05472 | Rheumatoid myopathy with rheumatoid arthritis of left ankle and foot             | RA |
| M05479 | Rheumatoid myopathy with rheumatoid arthritis of unspecified ankle and foot      | RA |
| M0549  | Rheumatoid myopathy with rheumatoid arthritis of multiple sites                  | RA |

|        |                                                                                       |    |
|--------|---------------------------------------------------------------------------------------|----|
| M0550  | Rheumatoid polyneuropathy with rheumatoid arthritis of unspecified site               | RA |
| M05511 | Rheumatoid polyneuropathy with rheumatoid arthritis of right shoulder                 | RA |
| M05512 | Rheumatoid polyneuropathy with rheumatoid arthritis of left shoulder                  | RA |
| M05519 | Rheumatoid polyneuropathy with rheumatoid arthritis of unspecified shoulder           | RA |
| M05521 | Rheumatoid polyneuropathy with rheumatoid arthritis of right elbow                    | RA |
| M05522 | Rheumatoid polyneuropathy with rheumatoid arthritis of left elbow                     | RA |
| M05529 | Rheumatoid polyneuropathy with rheumatoid arthritis of unspecified elbow              | RA |
| M05531 | Rheumatoid polyneuropathy with rheumatoid arthritis of right wrist                    | RA |
| M05532 | Rheumatoid polyneuropathy with rheumatoid arthritis of left wrist                     | RA |
| M05539 | Rheumatoid polyneuropathy with rheumatoid arthritis of unspecified wrist              | RA |
| M05541 | Rheumatoid polyneuropathy with rheumatoid arthritis of right hand                     | RA |
| M05542 | Rheumatoid polyneuropathy with rheumatoid arthritis of left hand                      | RA |
| M05549 | Rheumatoid polyneuropathy with rheumatoid arthritis of unspecified hand               | RA |
| M05551 | Rheumatoid polyneuropathy with rheumatoid arthritis of right hip                      | RA |
| M05552 | Rheumatoid polyneuropathy with rheumatoid arthritis of left hip                       | RA |
| M05559 | Rheumatoid polyneuropathy with rheumatoid arthritis of unspecified hip                | RA |
| M05561 | Rheumatoid polyneuropathy with rheumatoid arthritis of right knee                     | RA |
| M05562 | Rheumatoid polyneuropathy with rheumatoid arthritis of left knee                      | RA |
| M05569 | Rheumatoid polyneuropathy with rheumatoid arthritis of unspecified knee               | RA |
| M05571 | Rheumatoid polyneuropathy with rheumatoid arthritis of right ankle and foot           | RA |
| M05572 | Rheumatoid polyneuropathy with rheumatoid arthritis of left ankle and foot            | RA |
| M05579 | Rheumatoid polyneuropathy with rheumatoid arthritis of unspecified ankle and foot     | RA |
| M0559  | Rheumatoid polyneuropathy with rheumatoid arthritis of multiple sites                 | RA |
| M0560  | Rheumatoid arthritis of unspecified site with involvement of other organs and systems | RA |
| M05611 | Rheumatoid arthritis of right shoulder with involvement of other organs and systems   | RA |

|        |                                                                                                      |    |
|--------|------------------------------------------------------------------------------------------------------|----|
| M05612 | Rheumatoid arthritis of left shoulder with involvement of other organs and systems                   | RA |
| M05619 | Rheumatoid arthritis of unspecified shoulder with involvement of other organs and systems            | RA |
| M05621 | Rheumatoid arthritis of right elbow with involvement of other organs and systems                     | RA |
| M05622 | Rheumatoid arthritis of left elbow with involvement of other organs and systems                      | RA |
| M05629 | Rheumatoid arthritis of unspecified elbow with involvement of other organs and systems               | RA |
| M05631 | Rheumatoid arthritis of right wrist with involvement of other organs and systems                     | RA |
| M05632 | Rheumatoid arthritis of left wrist with involvement of other organs and systems                      | RA |
| M05639 | Rheumatoid arthritis of unspecified wrist with involvement of other organs and systems               | RA |
| M05641 | Rheumatoid arthritis of right hand with involvement of other organs and systems                      | RA |
| M05642 | Rheumatoid arthritis of left hand with involvement of other organs and systems                       | RA |
| M05649 | Rheumatoid arthritis of unspecified hand with involvement of other organs and systems                | RA |
| M05651 | Rheumatoid arthritis of right hip with involvement of other organs and systems                       | RA |
| M05652 | Rheumatoid arthritis of left hip with involvement of other organs and systems                        | RA |
| M05659 | Rheumatoid arthritis of unspecified hip with involvement of other organs and systems                 | RA |
| M05661 | Rheumatoid arthritis of right knee with involvement of other organs and systems                      | RA |
| M05662 | Rheumatoid arthritis of left knee with involvement of other organs and systems                       | RA |
| M05669 | Rheumatoid arthritis of unspecified knee with involvement of other organs and systems                | RA |
| M05671 | Rheumatoid arthritis of right ankle and foot with involvement of other organs and systems            | RA |
| M05672 | Rheumatoid arthritis of left ankle and foot with involvement of other organs and systems             | RA |
| M05679 | Rheumatoid arthritis of unspecified ankle and foot with involvement of other organs and systems      | RA |
| M0569  | Rheumatoid arthritis of multiple sites with involvement of other organs and systems                  | RA |
| M0570  | Rheumatoid arthritis with rheumatoid factor of unspecified site without organ or systems involvement | RA |
| M05711 | Rheumatoid arthritis with rheumatoid factor of right shoulder without organ or systems involvement   | RA |
| M05712 | Rheumatoid arthritis with rheumatoid factor of left shoulder without organ or systems involvement    | RA |

|        |                                                                                                                |    |
|--------|----------------------------------------------------------------------------------------------------------------|----|
| M05719 | Rheumatoid arthritis with rheumatoid factor of unspecified shoulder without organ or systems involvement       | RA |
| M05721 | Rheumatoid arthritis with rheumatoid factor of right elbow without organ or systems involvement                | RA |
| M05722 | Rheumatoid arthritis with rheumatoid factor of left elbow without organ or systems involvement                 | RA |
| M05729 | Rheumatoid arthritis with rheumatoid factor of unspecified elbow without organ or systems involvement          | RA |
| M05731 | Rheumatoid arthritis with rheumatoid factor of right wrist without organ or systems involvement                | RA |
| M05732 | Rheumatoid arthritis with rheumatoid factor of left wrist without organ or systems involvement                 | RA |
| M05739 | Rheumatoid arthritis with rheumatoid factor of unspecified wrist without organ or systems involvement          | RA |
| M05741 | Rheumatoid arthritis with rheumatoid factor of right hand without organ or systems involvement                 | RA |
| M05742 | Rheumatoid arthritis with rheumatoid factor of left hand without organ or systems involvement                  | RA |
| M05749 | Rheumatoid arthritis with rheumatoid factor of unspecified hand without organ or systems involvement           | RA |
| M05751 | Rheumatoid arthritis with rheumatoid factor of right hip without organ or systems involvement                  | RA |
| M05752 | Rheumatoid arthritis with rheumatoid factor of left hip without organ or systems involvement                   | RA |
| M05759 | Rheumatoid arthritis with rheumatoid factor of unspecified hip without organ or systems involvement            | RA |
| M05761 | Rheumatoid arthritis with rheumatoid factor of right knee without organ or systems involvement                 | RA |
| M05762 | Rheumatoid arthritis with rheumatoid factor of left knee without organ or systems involvement                  | RA |
| M05769 | Rheumatoid arthritis with rheumatoid factor of unspecified knee without organ or systems involvement           | RA |
| M05771 | Rheumatoid arthritis with rheumatoid factor of right ankle and foot without organ or systems involvement       | RA |
| M05772 | Rheumatoid arthritis with rheumatoid factor of left ankle and foot without organ or systems involvement        | RA |
| M05779 | Rheumatoid arthritis with rheumatoid factor of unspecified ankle and foot without organ or systems involvement | RA |
| M0579  | Rheumatoid arthritis with rheumatoid factor of multiple sites without organ or systems involvement             | RA |
| M0580  | Other rheumatoid arthritis with rheumatoid factor of unspecified site                                          | RA |



|        |                                                                                 |    |
|--------|---------------------------------------------------------------------------------|----|
| M05811 | Other rheumatoid arthritis with rheumatoid factor of right shoulder             | RA |
| M05812 | Other rheumatoid arthritis with rheumatoid factor of left shoulder              | RA |
| M05819 | Other rheumatoid arthritis with rheumatoid factor of unspecified shoulder       | RA |
| M05821 | Other rheumatoid arthritis with rheumatoid factor of right elbow                | RA |
| M05822 | Other rheumatoid arthritis with rheumatoid factor of left elbow                 | RA |
| M05829 | Other rheumatoid arthritis with rheumatoid factor of unspecified elbow          | RA |
| M05831 | Other rheumatoid arthritis with rheumatoid factor of right wrist                | RA |
| M05832 | Other rheumatoid arthritis with rheumatoid factor of left wrist                 | RA |
| M05839 | Other rheumatoid arthritis with rheumatoid factor of unspecified wrist          | RA |
| M05841 | Other rheumatoid arthritis with rheumatoid factor of right hand                 | RA |
| M05842 | Other rheumatoid arthritis with rheumatoid factor of left hand                  | RA |
| M05849 | Other rheumatoid arthritis with rheumatoid factor of unspecified hand           | RA |
| M05851 | Other rheumatoid arthritis with rheumatoid factor of right hip                  | RA |
| M05852 | Other rheumatoid arthritis with rheumatoid factor of left hip                   | RA |
| M05859 | Other rheumatoid arthritis with rheumatoid factor of unspecified hip            | RA |
| M05861 | Other rheumatoid arthritis with rheumatoid factor of right knee                 | RA |
| M05862 | Other rheumatoid arthritis with rheumatoid factor of left knee                  | RA |
| M05869 | Other rheumatoid arthritis with rheumatoid factor of unspecified knee           | RA |
| M05871 | Other rheumatoid arthritis with rheumatoid factor of right ankle and foot       | RA |
| M05872 | Other rheumatoid arthritis with rheumatoid factor of left ankle and foot        | RA |
| M05879 | Other rheumatoid arthritis with rheumatoid factor of unspecified ankle and foot | RA |
| M0589  | Other rheumatoid arthritis with rheumatoid factor of multiple sites             | RA |
| M059   | Rheumatoid arthritis with rheumatoid factor, unspecified                        | RA |
| M0600  | Rheumatoid arthritis without rheumatoid factor, unspecified site                | RA |
| M06011 | Rheumatoid arthritis without rheumatoid factor, right shoulder                  | RA |

|        |                                                                            |    |
|--------|----------------------------------------------------------------------------|----|
| M06012 | Rheumatoid arthritis without rheumatoid factor, left shoulder              | RA |
| M06019 | Rheumatoid arthritis without rheumatoid factor, unspecified shoulder       | RA |
| M06021 | Rheumatoid arthritis without rheumatoid factor, right elbow                | RA |
| M06022 | Rheumatoid arthritis without rheumatoid factor, left elbow                 | RA |
| M06029 | Rheumatoid arthritis without rheumatoid factor, unspecified elbow          | RA |
| M06031 | Rheumatoid arthritis without rheumatoid factor, right wrist                | RA |
| M06032 | Rheumatoid arthritis without rheumatoid factor, left wrist                 | RA |
| M06039 | Rheumatoid arthritis without rheumatoid factor, unspecified wrist          | RA |
| M06041 | Rheumatoid arthritis without rheumatoid factor, right hand                 | RA |
| M06042 | Rheumatoid arthritis without rheumatoid factor, left hand                  | RA |
| M06049 | Rheumatoid arthritis without rheumatoid factor, unspecified hand           | RA |
| M06051 | Rheumatoid arthritis without rheumatoid factor, right hip                  | RA |
| M06052 | Rheumatoid arthritis without rheumatoid factor, left hip                   | RA |
| M06059 | Rheumatoid arthritis without rheumatoid factor, unspecified hip            | RA |
| M06061 | Rheumatoid arthritis without rheumatoid factor, right knee                 | RA |
| M06062 | Rheumatoid arthritis without rheumatoid factor, left knee                  | RA |
| M06069 | Rheumatoid arthritis without rheumatoid factor, unspecified knee           | RA |
| M06071 | Rheumatoid arthritis without rheumatoid factor, right ankle and foot       | RA |
| M06072 | Rheumatoid arthritis without rheumatoid factor, left ankle and foot        | RA |
| M06079 | Rheumatoid arthritis without rheumatoid factor, unspecified ankle and foot | RA |
| M0608  | Rheumatoid arthritis without rheumatoid factor, vertebrae                  | RA |
| M0609  | Rheumatoid arthritis without rheumatoid factor, multiple sites             | RA |
| M061   | Adult-onset Still's disease                                                | RA |
| M0620  | Rheumatoid bursitis, unspecified site                                      | RA |
| M06211 | Rheumatoid bursitis, right shoulder                                        | RA |
| M06212 | Rheumatoid bursitis, left shoulder                                         | RA |
| M06219 | Rheumatoid bursitis, unspecified shoulder                                  | RA |
| M06221 | Rheumatoid bursitis, right elbow                                           | RA |
| M06222 | Rheumatoid bursitis, left elbow                                            | RA |
| M06229 | Rheumatoid bursitis, unspecified elbow                                     | RA |
| M06231 | Rheumatoid bursitis, right wrist                                           | RA |
| M06232 | Rheumatoid bursitis, left wrist                                            | RA |
| M06239 | Rheumatoid bursitis, unspecified wrist                                     | RA |
| M06241 | Rheumatoid bursitis, right hand                                            | RA |

|        |                                                        |    |
|--------|--------------------------------------------------------|----|
| M06242 | Rheumatoid bursitis, left hand                         | RA |
| M06249 | Rheumatoid bursitis, unspecified hand                  | RA |
| M06251 | Rheumatoid bursitis, right hip                         | RA |
| M06252 | Rheumatoid bursitis, left hip                          | RA |
| M06259 | Rheumatoid bursitis, unspecified hip                   | RA |
| M06261 | Rheumatoid bursitis, right knee                        | RA |
| M06262 | Rheumatoid bursitis, left knee                         | RA |
| M06269 | Rheumatoid bursitis, unspecified knee                  | RA |
| M06271 | Rheumatoid bursitis, right ankle and foot              | RA |
| M06272 | Rheumatoid bursitis, left ankle and foot               | RA |
| M06279 | Rheumatoid bursitis, unspecified ankle and foot        | RA |
| M0628  | Rheumatoid bursitis, vertebrae                         | RA |
| M0629  | Rheumatoid bursitis, multiple sites                    | RA |
| M0630  | Rheumatoid nodule, unspecified site                    | RA |
| M06311 | Rheumatoid nodule, right shoulder                      | RA |
| M06312 | Rheumatoid nodule, left shoulder                       | RA |
| M06319 | Rheumatoid nodule, unspecified shoulder                | RA |
| M06321 | Rheumatoid nodule, right elbow                         | RA |
| M06322 | Rheumatoid nodule, left elbow                          | RA |
| M06329 | Rheumatoid nodule, unspecified elbow                   | RA |
| M06331 | Rheumatoid nodule, right wrist                         | RA |
| M06332 | Rheumatoid nodule, left wrist                          | RA |
| M06339 | Rheumatoid nodule, unspecified wrist                   | RA |
| M06341 | Rheumatoid nodule, right hand                          | RA |
| M06342 | Rheumatoid nodule, left hand                           | RA |
| M06349 | Rheumatoid nodule, unspecified hand                    | RA |
| M06351 | Rheumatoid nodule, right hip                           | RA |
| M06352 | Rheumatoid nodule, left hip                            | RA |
| M06359 | Rheumatoid nodule, unspecified hip                     | RA |
| M06361 | Rheumatoid nodule, right knee                          | RA |
| M06362 | Rheumatoid nodule, left knee                           | RA |
| M06369 | Rheumatoid nodule, unspecified knee                    | RA |
| M06371 | Rheumatoid nodule, right ankle and foot                | RA |
| M06372 | Rheumatoid nodule, left ankle and foot                 | RA |
| M06379 | Rheumatoid nodule, unspecified ankle and foot          | RA |
| M0638  | Rheumatoid nodule, vertebrae                           | RA |
| M0639  | Rheumatoid nodule, multiple sites                      | RA |
| M064   | Inflammatory polyarthropathy                           | RA |
| M0680  | Other specified rheumatoid arthritis, unspecified site | RA |
| M06811 | Other specified rheumatoid arthritis, right shoulder   | RA |
| M06812 | Other specified rheumatoid arthritis, left shoulder    | RA |

|        |                                                                  |    |
|--------|------------------------------------------------------------------|----|
| M06819 | Other specified rheumatoid arthritis, unspecified shoulder       | RA |
| M06821 | Other specified rheumatoid arthritis, right elbow                | RA |
| M06822 | Other specified rheumatoid arthritis, left elbow                 | RA |
| M06829 | Other specified rheumatoid arthritis, unspecified elbow          | RA |
| M06831 | Other specified rheumatoid arthritis, right wrist                | RA |
| M06832 | Other specified rheumatoid arthritis, left wrist                 | RA |
| M06839 | Other specified rheumatoid arthritis, unspecified wrist          | RA |
| M06841 | Other specified rheumatoid arthritis, right hand                 | RA |
| M06842 | Other specified rheumatoid arthritis, left hand                  | RA |
| M06849 | Other specified rheumatoid arthritis, unspecified hand           | RA |
| M06851 | Other specified rheumatoid arthritis, right hip                  | RA |
| M06852 | Other specified rheumatoid arthritis, left hip                   | RA |
| M06859 | Other specified rheumatoid arthritis, unspecified hip            | RA |
| M06861 | Other specified rheumatoid arthritis, right knee                 | RA |
| M06862 | Other specified rheumatoid arthritis, left knee                  | RA |
| M06869 | Other specified rheumatoid arthritis, unspecified knee           | RA |
| M06871 | Other specified rheumatoid arthritis, right ankle and foot       | RA |
| M06872 | Other specified rheumatoid arthritis, left ankle and foot        | RA |
| M06879 | Other specified rheumatoid arthritis, unspecified ankle and foot | RA |
| M0688  | Other specified rheumatoid arthritis, vertebrae                  | RA |
| M0689  | Other specified rheumatoid arthritis, multiple sites             | RA |
| M069   | Rheumatoid arthritis, unspecified                                | RA |
