# Supplementary material for: Impact of Plan-Level Access Restrictions on Effectiveness of Biologics Among Patients with Rheumatoid or Psoriatic Arthritis
Source: PubMed Central journal article supplement — Pharmacoecon Open. 2019 Jun 8;4(1):105–17. doi: 10.1007/s41669-019-0152-1 (PMC7018889; doi:10.1007/s41669-019-0152-1), 2019-06-08
Supplement: 41669_2019_152_MOESM2_ESM.pdf [file 41669_2019_152_MOESM2_ESM.pdf]

## Impact of plan-level access restrictions on adherence and effectiveness of biologics among patients with rheumatoid or psoriatic arthritis

Pharmacoeconomics

Natalie Boytsov, Xiang Zhang, Kristin A. Evans, Barbara H. Johnson

Corresponding Author: Natalie Boytsov, Eli Lilly and Company, boytsov\_natalie\_n@lilly.com

### Online Resource 2: Additional baseline demographic characteristics of RA patients

|                                   | All RA Patients<br>N=3,993 | Access Restrictions |                  |                                    |                 | P value<br>(Any vs None) |
|-----------------------------------|----------------------------|---------------------|------------------|------------------------------------|-----------------|--------------------------|
|                                   |                            | Any<br>N=1,364      | PA Only<br>N=403 | Step Therapy <sup>a</sup><br>N=961 | None<br>N=2,629 |                          |
| <b>Region, N (%)</b>              |                            |                     |                  |                                    |                 |                          |
| Northeast                         | 484 (12.1%)                | 132 (9.7%)          | 49 (12.2%)       | 83 (8.6%)                          | 352 (13.4%)     | 0.001                    |
| North Central                     | 845 (21.2%)                | 192 (14.1%)         | 27 (6.7%)        | 165 (17.2%)                        | 653 (24.8%)     | <0.001                   |
| South                             | 2124 (53.2%)               | 844 (61.9%)         | 194 (48.1%)      | 650 (67.6%)                        | 1280 (48.7%)    | <0.001                   |
| West                              | 533 (13.3%)                | 195 (14.3%)         | 133 (33.0%)      | 62 (6.5%)                          | 338 (12.9%)     | 0.205                    |
| Unknown                           | 7 (0.2%)                   | 1 (0.1%)            | 0 (0.0%)         | 1 (0.1%)                           | 6 (0.2%)        | 0.000                    |
| <b>Urban residence, N (%)</b>     |                            |                     |                  |                                    |                 |                          |
| Urban                             | 3422 (85.7%)               | 1050 (77.0%)        | 289 (71.7%)      | 761 (79.2%)                        | 2372 (90.2%)    | <0.001                   |
| Rural                             | 564 (14.1%)                | 313 (22.9%)         | 114 (28.3%)      | 199 (20.7%)                        | 251 (9.5%)      | <0.001                   |
| Unknown                           |                            |                     |                  |                                    |                 |                          |
| <b>Insurance plan type, N (%)</b> |                            |                     |                  |                                    |                 |                          |
| Comprehensive                     | 209 (5.2%)                 | 27 (2.0%)           | 1 (0.2%)         | 26 (2.7%)                          | 182 (6.9%)      | <0.001                   |
| EPO/PPO                           | 2272 (56.9%)               | 749 (54.9%)         | 298 (73.9%)      | 451 (46.9%)                        | 1523 (57.9%)    | 0.068                    |
| POS/POS with capitation           | 337 (8.4%)                 | 104 (7.6%)          | 26 (6.5%)        | 78 (8.1%)                          | 233 (8.9%)      | 0.182                    |
| HMO                               | 255 (6.4%)                 | 139 (10.2%)         | 41 (10.2%)       | 98 (10.2%)                         | 116 (4.4%)      | <0.001                   |
| CDHP/HDHP                         | 878 (22.0%)                | 313 (22.9%)         | 19 (4.7%)        | 294 (30.6%)                        | 565 (21.5%)     | 0.292                    |
| Unknown                           | 42 (1.1%)                  | 32 (2.3%)           | 18 (4.5%)        | 14 (1.5%)                          | 10 (0.4%)       | <0.001                   |

Notes: <sup>a</sup>with or without PA. Abbreviations: CDHP, consumer driven health plan; EPO, exclusive provider organization; HDHP, high-deductible health plan; HMO, health maintenance organization; PA, prior authorization; POS, point of service; PPO, preferred provider organization; RA, rheumatoid arthritis
