# Supplementary material for: Impact of Plan-Level Access Restrictions on Effectiveness of Biologics Among Patients with Rheumatoid or Psoriatic Arthritis
Source: PubMed Central journal article supplement — Pharmacoecon Open. 2019 Jun 8;4(1):105–17. doi: 10.1007/s41669-019-0152-1 (PMC7018889; doi:10.1007/s41669-019-0152-1), 2019-06-08
Supplement: 41669_2019_152_MOESM3_ESM.pdf [file 41669_2019_152_MOESM3_ESM.pdf]

## Impact of plan-level access restrictions on adherence and effectiveness of biologics among patients with rheumatoid or psoriatic arthritis

PharmacoEconomics

Natalie Boytsov, Xiang Zhang, Kristin A. Evans, Barbara H. Johnson

Corresponding Author: Natalie Boytsov

**Online Resource 3:** Full results of multivariate models of the effect of access restrictions on medication adherence and effectiveness for both rheumatoid arthritis (RA) patients and psoriatic arthritis (PsA) patients

|                                                           | Any access restrictions vs. no access restrictions |                         |                         |                         |
|-----------------------------------------------------------|----------------------------------------------------|-------------------------|-------------------------|-------------------------|
|                                                           | RA Patients                                        |                         | PsA Patients            |                         |
|                                                           | Medication Adherence                               | Treatment Effectiveness | Medication Adherence    | Treatment Effectiveness |
|                                                           | OR (95% CI)                                        | OR (95% CI)             | OR (95% CI)             | OR (95% CI)             |
| <b>Any access restrictions vs. no access restrictions</b> | <b>0.90 (0.77-1.05)</b>                            | <b>0.93 (0.78-1.10)</b> | <b>0.82 (0.64-1.06)</b> | <b>0.87 (0.67-1.14)</b> |
| <b>Age group (ref: 55-64)</b>                             |                                                    |                         |                         |                         |
| 18-34                                                     | 0.67 (0.50-0.89)                                   | 0.67 (0.49-0.91)        | 0.68 (0.44-1.03)        | 0.78 (0.50-1.21)        |
| 35-44                                                     | 0.80 (0.65-1.00)                                   | 0.83 (0.65-1.05)        | 1.05 (0.76-1.46)        | 1.16 (0.83-1.63)        |
| 45-54                                                     | 1.04 (0.88-1.22)                                   | 1.04 (0.87-1.24)        | 1.03 (0.78-1.37)        | 1.04 (0.77-1.41)        |
| <b>Male</b>                                               | <b>1.24 (1.05-1.46)</b>                            | <b>1.26 (1.05-1.51)</b> | <b>1.32 (1.05-1.67)</b> | <b>1.31 (1.02-1.67)</b> |
| <b>Region (ref: Northeast)</b>                            |                                                    |                         |                         |                         |
| North Central                                             | 0.94 (0.73-1.20)                                   | 0.97 (0.75-1.26)        | 0.98 (0.67-1.44)        | 0.95 (0.64-1.43)        |
| South/unknown                                             | 0.69 (0.56-0.86)                                   | 0.71 (0.56-0.90)        | 0.89 (0.64-1.24)        | 0.91 (0.64-1.30)        |
| West                                                      | 0.87 (0.67-1.14)                                   | 0.87 (0.65-1.16)        | 1.09 (0.71-1.66)        | 1.16 (0.75-1.81)        |
| <b>Rural/unknown (vs. urban)</b>                          | <b>0.87 (0.71-1.07)</b>                            | <b>0.94 (0.75-1.18)</b> | <b>1.47 (1.06-2.03)</b> | <b>1.34 (0.95-1.89)</b> |
| <b>EPO/PPO (vs. other insurance plan type)</b>            | <b>1.00 (0.87-1.15)</b>                            | <b>1.03 (0.88-1.20)</b> | <b>0.86 (0.68-1.09)</b> | <b>0.85 (0.66-1.08)</b> |
| <b>Pre-index comorbidities</b>                            |                                                    |                         |                         |                         |
| Anemia                                                    | 0.90 (0.67-1.21)                                   | 0.86 (0.62-1.21)        | 0.74 (0.39-1.41)        | 0.38 (0.16-0.90)        |
| Anxiety or depression                                     | 0.75 (0.60-0.94)                                   | 0.72 (0.56-0.92)        | 0.78 (0.54-1.12)        | 0.74 (0.50-1.10)        |
| CVD                                                       | 0.73 (0.53-1.01)                                   | 0.71 (0.49-1.03)        | 0.95 (0.57-1.60)        | 0.71 (0.38-1.30)        |
| Respiratory condition                                     | 1.07 (0.85-1.36)                                   | 0.97 (0.75-1.27)        | 0.67 (0.41-1.08)        | 0.53 (0.30-0.92)        |
| Diabetes (type 1 or 2)                                    | 0.91 (0.73-1.14)                                   | 0.76 (0.59-0.98)        | 1.01 (0.71-1.44)        | 1.08 (0.75-1.57)        |
| Dyslipidemia                                              | 1.01 (0.81-1.25)                                   | 1.02 (0.80-1.30)        | 0.95 (0.69-1.33)        | 1.00 (0.70-1.42)        |
| Fibromyalgia                                              | 0.82 (0.65-1.04)                                   | 0.74 (0.56-0.97)        | 0.64 (0.39-1.06)        | 0.70 (0.41-1.20)        |
| Hypertension                                              | 0.86 (0.72-1.02)                                   | 0.82 (0.67-0.99)        | 0.87 (0.65-1.16)        | 0.88 (0.65-1.20)        |
| Low back pain                                             | 0.90 (0.70-1.14)                                   | 0.77 (0.58-1.02)        | 0.80 (0.55-1.17)        | 0.72 (0.47-1.10)        |
| Malignancy                                                | 0.82 (0.53-1.28)                                   | 1.10 (0.70-1.73)        | 0.77 (0.38-1.58)        | 0.75 (0.34-1.64)        |
| Osteoarthritis                                            | 0.92 (0.77-1.09)                                   | 0.88 (0.73-1.07)        | 0.90 (0.66-1.22)        | 0.82 (0.59-1.15)        |
| Osteoporosis                                              | 0.94 (0.66-1.33)                                   | 0.99 (0.67-1.45)        | 1.01 (0.35-2.90)        | 1.02 (0.33-3.21)        |

|                                           |                  |                  |                  |                  |
|-------------------------------------------|------------------|------------------|------------------|------------------|
| Psoriasis                                 | 0.81 (0.51-1.28) | 0.96 (0.59-1.56) | 1.03 (0.82-1.29) | 0.98 (0.77-1.24) |
| Pre-index bDMARD or tsDMARD               | 1.42 (1.02-1.99) | 1.08 (0.74-1.57) | 2.13 (1.32-3.43) | 1.28 (0.75-2.17) |
| Pre-index healthcare costs                | 1.00 (1.00-1.00) | 1.00 (1.00-1.00) | 1.00 (1.00-1.00) | 1.00 (1.00-1.00) |
| Number of pre-index rheumatologist visits | 0.98 (0.92-1.06) | 1.01 (0.93-1.09) | 1.27 (1.12-1.44) | 1.20 (1.06-1.37) |
| Pre-index glucocorticoid                  | 1.01 (0.86-1.17) | 0.82 (0.70-0.97) | 1.20 (0.95-1.52) | 1.10 (0.86-1.41) |

|                                                                       | PA only vs. step therapy or no access restrictions |                         |                         |                         |
|-----------------------------------------------------------------------|----------------------------------------------------|-------------------------|-------------------------|-------------------------|
|                                                                       | RA Patients                                        |                         | PsA Patients            |                         |
|                                                                       | Medication Adherence                               | Treatment Effectiveness | Medication Adherence    | Treatment Effectiveness |
|                                                                       | OR (95% CI)                                        | OR (95% CI)             | OR (95% CI)             | OR (95% CI)             |
| <b>PA only vs. step therapy<sup>a</sup> or no access restrictions</b> | <b>1.18 (0.93-1.50)</b>                            | <b>1.24 (0.96-1.60)</b> | <b>1.29 (0.85-1.95)</b> | <b>1.42 (0.92-2.18)</b> |
| <b>Age group (ref: 55-64)</b>                                         |                                                    |                         |                         |                         |
| 18-34                                                                 | 0.67 (0.50-0.88)                                   | 0.66 (0.49-0.91)        | 0.67 (0.44-1.02)        | 0.77 (0.50-1.20)        |
| 35-44                                                                 | 0.80 (0.65-1.00)                                   | 0.83 (0.65-1.05)        | 1.05 (0.76-1.45)        | 1.16 (0.82-1.63)        |
| 45-54                                                                 | 1.04 (0.88-1.22)                                   | 1.04 (0.87-1.24)        | 1.02 (0.77-1.36)        | 1.04 (0.76-1.41)        |
| <b>Male</b>                                                           | <b>1.24 (1.05-1.46)</b>                            | <b>1.26 (1.05-1.51)</b> | <b>1.33 (1.06-1.68)</b> | <b>1.31 (1.03-1.68)</b> |
| <b>Region (ref: Northeast)</b>                                        |                                                    |                         |                         |                         |
| North Central                                                         | 0.96 (0.75-1.22)                                   | 0.99 (0.76-1.29)        | 0.98 (0.67-1.44)        | 0.95 (0.64-1.43)        |
| South/unknown                                                         | 0.69 (0.55-0.86)                                   | 0.71 (0.56-0.89)        | 0.85 (0.61-1.19)        | 0.89 (0.62-1.26)        |
| West                                                                  | 0.84 (0.64-1.11)                                   | 0.84 (0.62-1.12)        | 1.00 (0.65-1.53)        | 1.06 (0.67-1.66)        |
| <b>Rural/unknown (vs. urban)</b>                                      | <b>0.83 (0.68-1.03)</b>                            | <b>0.90 (0.72-1.14)</b> | <b>1.40 (1.02-1.92)</b> | <b>1.29 (0.92-1.81)</b> |
| <b>EPO/PPO (vs. other insurance plan type)</b>                        | <b>0.99 (0.86-1.15)</b>                            | <b>1.02 (0.87-1.19)</b> | <b>0.88 (0.70-1.11)</b> | <b>0.86 (0.67-1.09)</b> |
| <b>Pre-index comorbidities</b>                                        |                                                    |                         |                         |                         |
| Anemia                                                                | 0.90 (0.66-1.21)                                   | 0.86 (0.61-1.21)        | 0.75 (0.40-1.43)        | 0.39 (0.16-0.92)        |
| Anxiety or depression                                                 | 0.75 (0.60-0.93)                                   | 0.72 (0.56-0.92)        | 0.77 (0.54-1.10)        | 0.74 (0.50-1.09)        |
| CVD                                                                   | 0.72 (0.53-1.00)                                   | 0.71 (0.49-1.02)        | 0.95 (0.57-1.60)        | 0.70 (0.38-1.29)        |
| Respiratory condition                                                 | 1.06 (0.84-1.35)                                   | 0.97 (0.74-1.26)        | 0.66 (0.41-1.07)        | 0.52 (0.30-0.91)        |
| Diabetes (type 1 or 2)                                                | 0.91 (0.73-1.14)                                   | 0.76 (0.58-0.98)        | 1.02 (0.72-1.45)        | 1.09 (0.75-1.58)        |
| Dyslipidemia                                                          | 1.01 (0.81-1.25)                                   | 1.02 (0.80-1.29)        | 0.95 (0.68-1.32)        | 0.99 (0.69-1.40)        |
| Fibromyalgia                                                          | 0.82 (0.65-1.04)                                   | 0.74 (0.57-0.97)        | 0.63 (0.39-1.04)        | 0.69 (0.41-1.19)        |
| Hypertension                                                          | 0.85 (0.71-1.01)                                   | 0.81 (0.67-0.98)        | 0.85 (0.64-1.14)        | 0.87 (0.64-1.18)        |
| Low back pain                                                         | 0.90 (0.70-1.14)                                   | 0.77 (0.58-1.02)        | 0.81 (0.55-1.19)        | 0.73 (0.48-1.11)        |
| Malignancy                                                            | 0.82 (0.53-1.28)                                   | 1.10 (0.70-1.73)        | 0.79 (0.39-1.63)        | 0.77 (0.35-1.69)        |
| Osteoarthritis                                                        | 0.92 (0.77-1.09)                                   | 0.88 (0.73-1.07)        | 0.89 (0.66-1.22)        | 0.82 (0.59-1.15)        |
| Osteoporosis                                                          | 0.93 (0.65-1.33)                                   | 0.98 (0.67-1.45)        | 1.07 (0.37-3.06)        | 1.08 (0.35-3.39)        |
| Psoriasis                                                             | 0.80 (0.50-1.27)                                   | 0.95 (0.59-1.54)        | 1.02 (0.82-1.28)        | 0.97 (0.77-1.23)        |
| Pre-index bDMARD or tsDMARD                                           | 1.40 (1.00-1.96)                                   | 1.06 (0.72-1.55)        | 2.16 (1.34-3.48)        | 1.31 (0.77-2.22)        |
| Pre-index healthcare costs                                            | 1.00 (1.00-1.00)                                   | 1.00 (1.00-1.00)        | 1.00 (1.00-1.00)        | 1.00 (1.00-1.00)        |

|                                                  |                         |                         |                         |                         |
|--------------------------------------------------|-------------------------|-------------------------|-------------------------|-------------------------|
| <b>Number of pre-index rheumatologist visits</b> | <b>0.98 (0.92-1.06)</b> | <b>1.01 (0.93-1.09)</b> | <b>1.28 (1.13-1.44)</b> | <b>1.21 (1.06-1.37)</b> |
| <b>Pre-index glucocorticoid</b>                  | <b>1.00 (0.86-1.17)</b> | <b>0.82 (0.70-0.97)</b> | <b>1.19 (0.94-1.49)</b> | <b>1.09 (0.85-1.39)</b> |

|                                                                       | <b>Step therapy vs. PA only or no access restrictions</b> |                         |                         |                         |
|-----------------------------------------------------------------------|-----------------------------------------------------------|-------------------------|-------------------------|-------------------------|
|                                                                       | RA Patients                                               |                         | PsA Patients            |                         |
|                                                                       | Medication Adherence                                      | Treatment Effectiveness | Medication Adherence    | Treatment Effectiveness |
|                                                                       | <b>OR (95% CI)</b>                                        | <b>OR (95% CI)</b>      | <b>OR (95% CI)</b>      | <b>OR (95% CI)</b>      |
| <b>Step therapy<sup>a</sup> vs. PA only or no access restrictions</b> | <b>0.81 (0.68-0.96)</b>                                   | <b>0.81 (0.67-0.98)</b> | <b>0.71 (0.54-0.94)</b> | <b>0.73 (0.54-0.98)</b> |
| <b>Age group (ref: 55-64)</b>                                         |                                                           |                         |                         |                         |
| 18-34                                                                 | <b>0.67 (0.50-0.89)</b>                                   | <b>0.67 (0.49-0.91)</b> | <b>0.69 (0.45-1.05)</b> | <b>0.80 (0.51-1.24)</b> |
| 35-44                                                                 | <b>0.80 (0.65-1.00)</b>                                   | <b>0.83 (0.65-1.05)</b> | <b>1.06 (0.77-1.47)</b> | <b>1.17 (0.83-1.65)</b> |
| 45-54                                                                 | <b>1.04 (0.88-1.23)</b>                                   | <b>1.04 (0.87-1.24)</b> | <b>1.03 (0.78-1.38)</b> | <b>1.05 (0.77-1.42)</b> |
| <b>Male</b>                                                           | <b>1.24 (1.05-1.47)</b>                                   | <b>1.26 (1.06-1.51)</b> | <b>1.32 (1.05-1.66)</b> | <b>1.30 (1.02-1.66)</b> |
| <b>Region (ref: Northeast)</b>                                        |                                                           |                         |                         |                         |
| North Central                                                         | <b>0.95 (0.74-1.21)</b>                                   | <b>0.98 (0.75-1.27)</b> | <b>0.99 (0.68-1.45)</b> | <b>0.96 (0.64-1.44)</b> |
| South/unknown                                                         | <b>0.70 (0.57-0.87)</b>                                   | <b>0.72 (0.57-0.91)</b> | <b>0.92 (0.66-1.28)</b> | <b>0.95 (0.66-1.35)</b> |
| West                                                                  | <b>0.86 (0.65-1.12)</b>                                   | <b>0.86 (0.64-1.15)</b> | <b>1.05 (0.69-1.60)</b> | <b>1.13 (0.73-1.77)</b> |
| <b>Rural/unknown (vs. urban)</b>                                      | <b>0.87 (0.71-1.07)</b>                                   | <b>0.95 (0.76-1.19)</b> | <b>1.50 (1.09-2.08)</b> | <b>1.38 (0.98-1.94)</b> |
| <b>EPO/PPO (vs. other insurance plan type)</b>                        | <b>0.98 (0.85-1.14)</b>                                   | <b>1.01 (0.87-1.19)</b> | <b>0.84 (0.67-1.07)</b> | <b>0.82 (0.64-1.05)</b> |
| <b>Pre-index comorbidities</b>                                        |                                                           |                         |                         |                         |
| Anemia                                                                | <b>0.90 (0.67-1.22)</b>                                   | <b>0.86 (0.62-1.21)</b> | <b>0.74 (0.39-1.41)</b> | <b>0.38 (0.16-0.90)</b> |
| Anxiety or depression                                                 | <b>0.75 (0.60-0.94)</b>                                   | <b>0.72 (0.56-0.92)</b> | <b>0.78 (0.55-1.12)</b> | <b>0.75 (0.51-1.11)</b> |
| CVD                                                                   | <b>0.73 (0.53-1.00)</b>                                   | <b>0.71 (0.49-1.02)</b> | <b>0.94 (0.56-1.59)</b> | <b>0.70 (0.38-1.28)</b> |
| Respiratory condition                                                 | <b>1.07 (0.85-1.36)</b>                                   | <b>0.98 (0.75-1.28)</b> | <b>0.66 (0.41-1.07)</b> | <b>0.52 (0.30-0.92)</b> |
| Diabetes (type 1 or 2)                                                | <b>0.92 (0.73-1.15)</b>                                   | <b>0.76 (0.59-0.99)</b> | <b>1.01 (0.71-1.43)</b> | <b>1.08 (0.74-1.56)</b> |
| Dyslipidemia                                                          | <b>1.01 (0.81-1.25)</b>                                   | <b>1.02 (0.80-1.29)</b> | <b>0.96 (0.69-1.33)</b> | <b>1.00 (0.70-1.42)</b> |
| Fibromyalgia                                                          | <b>0.82 (0.65-1.03)</b>                                   | <b>0.73 (0.56-0.96)</b> | <b>0.65 (0.39-1.06)</b> | <b>0.71 (0.41-1.21)</b> |
| Hypertension                                                          | <b>0.86 (0.72-1.02)</b>                                   | <b>0.82 (0.68-1.00)</b> | <b>0.87 (0.66-1.17)</b> | <b>0.89 (0.65-1.21)</b> |
| Low back pain                                                         | <b>0.90 (0.70-1.14)</b>                                   | <b>0.77 (0.58-1.02)</b> | <b>0.80 (0.54-1.17)</b> | <b>0.71 (0.47-1.09)</b> |
| Malignancy                                                            | <b>0.82 (0.53-1.28)</b>                                   | <b>1.10 (0.70-1.73)</b> | <b>0.77 (0.38-1.59)</b> | <b>0.75 (0.34-1.64)</b> |
| Osteoarthritis                                                        | <b>0.93 (0.78-1.10)</b>                                   | <b>0.89 (0.73-1.08)</b> | <b>0.91 (0.67-1.23)</b> | <b>0.83 (0.59-1.16)</b> |
| Osteoporosis                                                          | <b>0.93 (0.65-1.33)</b>                                   | <b>0.98 (0.67-1.45)</b> | <b>1.02 (0.36-2.93)</b> | <b>1.02 (0.33-3.21)</b> |
| Psoriasis                                                             | <b>0.80 (0.51-1.27)</b>                                   | <b>0.96 (0.59-1.55)</b> | <b>1.03 (0.82-1.30)</b> | <b>0.98 (0.77-1.25)</b> |
| <b>Pre-index bDMARD or tsDMARD</b>                                    | <b>1.41 (1.01-1.97)</b>                                   | <b>1.07 (0.73-1.56)</b> | <b>2.15 (1.33-3.46)</b> | <b>1.29 (0.76-2.19)</b> |
| <b>Pre-index healthcare costs</b>                                     | <b>1.00 (1.00-1.00)</b>                                   | <b>1.00 (1.00-1.00)</b> | <b>1.00 (1.00-1.00)</b> | <b>1.00 (1.00-1.00)</b> |
| <b>Number of pre-index rheumatologist visits</b>                      | <b>0.98 (0.91-1.06)</b>                                   | <b>1.01 (0.93-1.09)</b> | <b>1.27 (1.13-1.44)</b> | <b>1.20 (1.06-1.37)</b> |
| <b>Pre-index glucocorticoid</b>                                       | <b>1.01 (0.87-1.18)</b>                                   | <b>0.83 (0.70-0.97)</b> | <b>1.20 (0.95-1.52)</b> | <b>1.10 (0.86-1.41)</b> |

|                                                            | Step therapy vs. no access restrictions<br>and<br>PA only vs. no access restrictions |                         |                         |                         |
|------------------------------------------------------------|--------------------------------------------------------------------------------------|-------------------------|-------------------------|-------------------------|
|                                                            | RA Patients                                                                          |                         | PsA Patients            |                         |
|                                                            | Medication Adherence                                                                 | Treatment Effectiveness | Medication Adherence    | Treatment Effectiveness |
|                                                            | OR (95% CI)                                                                          | OR (95% CI)             | OR (95% CI)             | OR (95% CI)             |
| <b>Step therapy<sup>a</sup> vs. no access restrictions</b> | <b>0.82 (0.69-0.98)</b>                                                              | <b>0.83 (0.68-1.01)</b> | <b>0.73 (0.55-0.96)</b> | <b>0.75 (0.56-1.02)</b> |
| <b>Prior authorization only vs. no access restrictions</b> | <b>1.12 (0.88-1.43)</b>                                                              | <b>1.18 (0.91-1.53)</b> | <b>1.18 (0.78-1.81)</b> | <b>1.32 (0.85-2.04)</b> |
| <b>Age group (ref: 55-64)</b>                              |                                                                                      |                         |                         |                         |
| 18-34                                                      | <b>0.67 (0.50-0.89)</b>                                                              | <b>0.67 (0.49-0.91)</b> | <b>0.69 (0.45-1.05)</b> | <b>0.80 (0.51-1.24)</b> |
| 35-44                                                      | <b>0.80 (0.65-1.00)</b>                                                              | <b>0.83 (0.65-1.05)</b> | <b>1.06 (0.77-1.47)</b> | <b>1.17 (0.83-1.65)</b> |
| 45-54                                                      | <b>1.04 (0.88-1.23)</b>                                                              | <b>1.04 (0.87-1.24)</b> | <b>1.03 (0.78-1.37)</b> | <b>1.04 (0.77-1.42)</b> |
| <b>Male</b>                                                | <b>1.24 (1.05-1.47)</b>                                                              | <b>1.27 (1.06-1.51)</b> | <b>1.32 (1.05-1.66)</b> | <b>1.30 (1.02-1.66)</b> |
| <b>Region (ref: Northeast)</b>                             |                                                                                      |                         |                         |                         |
| North Central                                              | <b>0.96 (0.75-1.22)</b>                                                              | <b>0.99 (0.76-1.29)</b> | <b>0.99 (0.68-1.45)</b> | <b>0.96 (0.64-1.44)</b> |
| South/unknown                                              | <b>0.70 (0.57-0.88)</b>                                                              | <b>0.72 (0.57-0.91)</b> | <b>0.91 (0.65-1.28)</b> | <b>0.94 (0.66-1.35)</b> |
| West                                                       | <b>0.84 (0.64-1.11)</b>                                                              | <b>0.84 (0.62-1.12)</b> | <b>1.02 (0.66-1.56)</b> | <b>1.08 (0.69-1.69)</b> |
| <b>Rural/unknown (vs. urban)</b>                           | <b>0.86 (0.69-1.06)</b>                                                              | <b>0.93 (0.74-1.16)</b> | <b>1.49 (1.08-2.06)</b> | <b>1.36 (0.96-1.92)</b> |
| <b>EPO/PPO (vs. other insurance plan type)</b>             | <b>0.98 (0.85-1.13)</b>                                                              | <b>1.01 (0.86-1.18)</b> | <b>0.84 (0.67-1.07)</b> | <b>0.82 (0.64-1.05)</b> |
| <b>Pre-index comorbidities</b>                             |                                                                                      |                         |                         |                         |
| Anemia                                                     | <b>0.90 (0.67-1.22)</b>                                                              | <b>0.86 (0.62-1.21)</b> | <b>0.75 (0.39-1.42)</b> | <b>0.38 (0.16-0.91)</b> |
| Anxiety or depression                                      | <b>0.75 (0.60-0.94)</b>                                                              | <b>0.72 (0.56-0.92)</b> | <b>0.78 (0.55-1.12)</b> | <b>0.75 (0.51-1.11)</b> |
| CVD                                                        | <b>0.72 (0.53-1.00)</b>                                                              | <b>0.71 (0.49-1.02)</b> | <b>0.94 (0.56-1.58)</b> | <b>0.69 (0.38-1.27)</b> |
| Respiratory condition                                      | <b>1.07 (0.84-1.36)</b>                                                              | <b>0.97 (0.74-1.27)</b> | <b>0.66 (0.41-1.07)</b> | <b>0.52 (0.30-0.91)</b> |
| Diabetes (type 1 or 2)                                     | <b>0.92 (0.73-1.15)</b>                                                              | <b>0.76 (0.59-0.99)</b> | <b>1.01 (0.71-1.43)</b> | <b>1.08 (0.74-1.56)</b> |
| Dyslipidemia                                               | <b>1.01 (0.81-1.25)</b>                                                              | <b>1.02 (0.80-1.29)</b> | <b>0.96 (0.69-1.33)</b> | <b>1.00 (0.70-1.42)</b> |
| Fibromyalgia                                               | <b>0.82 (0.65-1.04)</b>                                                              | <b>0.74 (0.56-0.96)</b> | <b>0.65 (0.39-1.06)</b> | <b>0.70 (0.41-1.20)</b> |
| Hypertension                                               | <b>0.86 (0.72-1.02)</b>                                                              | <b>0.82 (0.67-0.99)</b> | <b>0.87 (0.65-1.16)</b> | <b>0.89 (0.65-1.21)</b> |
| Low back pain                                              | <b>0.90 (0.70-1.14)</b>                                                              | <b>0.77 (0.58-1.02)</b> | <b>0.80 (0.54-1.17)</b> | <b>0.72 (0.47-1.09)</b> |
| Malignancy                                                 | <b>0.82 (0.53-1.28)</b>                                                              | <b>1.10 (0.70-1.73)</b> | <b>0.78 (0.38-1.60)</b> | <b>0.76 (0.35-1.66)</b> |
| Osteoarthritis                                             | <b>0.93 (0.78-1.10)</b>                                                              | <b>0.89 (0.73-1.08)</b> | <b>0.91 (0.67-1.24)</b> | <b>0.83 (0.60-1.17)</b> |
| Osteoporosis                                               | <b>0.93 (0.65-1.33)</b>                                                              | <b>0.98 (0.67-1.45)</b> | <b>1.04 (0.36-2.98)</b> | <b>1.05 (0.34-3.30)</b> |
| Psoriasis                                                  | <b>0.80 (0.50-1.27)</b>                                                              | <b>0.95 (0.58-1.54)</b> | <b>1.03 (0.82-1.30)</b> | <b>0.98 (0.77-1.25)</b> |
| <b>Pre-index bDMARD or tsDMARD</b>                         | <b>1.40 (1.00-1.96)</b>                                                              | <b>1.06 (0.72-1.55)</b> | <b>2.16 (1.34-3.48)</b> | <b>1.30 (0.77-2.21)</b> |
| <b>Pre-index healthcare costs</b>                          | <b>1.00 (1.00-1.00)</b>                                                              | <b>1.00 (1.00-1.00)</b> | <b>1.00 (1.00-1.00)</b> | <b>1.00 (1.00-1.00)</b> |
| <b>Number of pre-index rheumatologist visits</b>           | <b>0.98 (0.91-1.06)</b>                                                              | <b>1.01 (0.93-1.09)</b> | <b>1.28 (1.13-1.44)</b> | <b>1.21 (1.06-1.37)</b> |
| <b>Pre-index glucocorticoid</b>                            | <b>1.01 (0.86-1.18)</b>                                                              | <b>0.82 (0.70-0.97)</b> | <b>1.20 (0.95-1.51)</b> | <b>1.10 (0.86-1.40)</b> |

Notes: <sup>a</sup>with or without PA. Abbreviations: bDMARD, biologic DMARD; CI, confidence interval; DMARD, disease-modifying antirheumatic drug; EPO, exclusive provider organization;

OR, odds ratio; PA, prior authorization; PPO, preferred provider organization; tsDMARD, targeted synthetic DMARD; light green:  $p < 0.05$ ; dark green:  $p < 0.01$
