# Supplementary material for: Impact of Plan-Level Access Restrictions on Effectiveness of Biologics Among Patients with Rheumatoid or Psoriatic Arthritis
Source: PubMed Central journal article supplement — Pharmacoecon Open. 2019 Jun 8;4(1):105–17. doi: 10.1007/s41669-019-0152-1 (PMC7018889; doi:10.1007/s41669-019-0152-1), 2019-06-08
Supplement: 41669_2019_152_MOESM4_ESM.pdf [file 41669_2019_152_MOESM4_ESM.pdf]

## Impact of plan-level access restrictions on adherence and effectiveness of biologics among patients with rheumatoid or psoriatic arthritis

PharmacoEconomics

Natalie Boytsov, Xiang Zhang, Kristin A. Evans, Barbara H. Johnson

Corresponding Author: Natalie Boytsov, Eli Lilly and Company, boytsov\_natalie\_n@lilly.com

### Online Resource 4: Baseline demographic and clinical characteristics of psoriatic arthritis (PsA) patients

|                                   | All PsA Patients<br>N=1,713 | Access Restrictions |                  |                                    |                 | P value<br>(Any vs None) |
|-----------------------------------|-----------------------------|---------------------|------------------|------------------------------------|-----------------|--------------------------|
|                                   |                             | Any<br>N=601        | PA Only<br>N=127 | Step Therapy <sup>a</sup><br>N=474 | None<br>N=1,112 |                          |
| <b>Age, mean (SD)</b>             | 47.4 (10.4)                 | 47.1 (10.7)         | 47.5 (10.7)      | 47.1 (10.8)                        | 47.6 (10.2)     | 0.408                    |
| <b>Age group, N (%)</b>           |                             |                     |                  |                                    |                 |                          |
| 18-34                             | 217 (12.7%)                 | 83 (13.8%)          | 16 (12.6%)       | 67 (14.1%)                         | 134 (12.1%)     | 0.296                    |
| 35-44                             | 405 (23.6%)                 | 144 (24.0%)         | 28 (22.0%)       | 116 (24.5%)                        | 261 (23.5%)     | 0.820                    |
| 45-54                             | 587 (34.3%)                 | 201 (33.4%)         | 44 (34.6%)       | 157 (33.1%)                        | 386 (34.7%)     | 0.598                    |
| <b>Male, N (%)</b>                | 789 (46.1%)                 | 252 (41.9%)         | 62 (48.8%)       | 190 (40.1%)                        | 537 (48.3%)     | 0.012                    |
| <b>Region, N (%)</b>              |                             |                     |                  |                                    |                 |                          |
| Northeast                         | 249 (14.5%)                 | 45 (7.5%)           | 12 (9.4%)        | 33 (7.0%)                          | 204 (18.3%)     | <0.001                   |
| North Central                     | 345 (20.1%)                 | 83 (13.8%)          | 16 (12.6%)       | 67 (14.1%)                         | 262 (23.6%)     | <0.001                   |
| South                             | 904 (52.8%)                 | 396 (65.9%)         | 48 (37.8%)       | 348 (73.4%)                        | 508 (45.7%)     | <0.001                   |
| West                              | 212 (12.4%)                 | 77 (12.8%)          | 51 (40.2%)       | 26 (5.5%)                          | 135 (12.1%)     | 0.687                    |
| Unknown                           | 3 (0.2%)                    | 0 (0.0%)            | 0 (0.0%)         | 0 (0.0%)                           | 3 (0.3%)        |                          |
| <b>Urban residence, N (%)</b>     |                             |                     |                  |                                    |                 |                          |
| Urban                             | 1486 (86.7%)                | 474 (78.9%)         | 107 (84.3%)      | 367 (77.4%)                        | 1012 (91.0%)    | <0.001                   |
| Rural                             | 224 (13.1%)                 | 127 (21.1%)         | 20 (15.7%)       | 107 (22.6%)                        | 97 (8.7%)       | <0.001                   |
| Unknown                           | 3 (0.2%)                    | 0 (0.0%)            | 0 (0.0%)         | 0 (0.0%)                           | 3 (0.3%)        |                          |
| <b>Insurance plan type, N (%)</b> |                             |                     |                  |                                    |                 |                          |
| Comprehensive                     | 61 (3.6%)                   | 9 (1.5%)            | 0 (0.0%)         | 9 (1.9%)                           | 52 (4.7%)       | 0.001                    |
| EPO/PPO                           | 1030 (60.1%)                | 317 (52.7%)         | 85 (66.9%)       | 232 (48.9%)                        | 713 (64.1%)     | <0.001                   |
| POS/POS with capitation           | 117 (6.8%)                  | 43 (7.2%)           | 6 (4.7%)         | 37 (7.8%)                          | 74 (6.7%)       | 0.695                    |
| HMO                               | 97 (5.7%)                   | 65 (10.8%)          | 24 (18.9%)       | 41 (8.6%)                          | 32 (2.9%)       | <0.001                   |
| CDHP/HDHP                         | 385 (22.5%)                 | 152 (25.3%)         | 6 (4.7%)         | 146 (30.8%)                        | 233 (21.0%)     | 0.040                    |
| Unknown                           | 23 (1.3%)                   | 15 (2.5%)           | 6 (4.7%)         | 9 (1.9%)                           | 8 (0.7%)        | 0.002                    |
| <b>DCI, mean (SD)</b>             | 0.3 (0.8)                   | 0.3 (0.8)           | 0.4 (1.0)        | 0.3 (0.8)                          | 0.3 (0.9)       | 0.912                    |
| <b>Comorbid Conditions, N (%)</b> |                             |                     |                  |                                    |                 |                          |
| Anemia                            | 65 (3.8%)                   | 23 (3.8%)           | 3 (2.4%)         | 20 (4.2%)                          | 42 (3.8%)       | 0.959                    |
| Anxiety                           | 126 (7.4%)                  | 50 (8.3%)           | 8 (6.3%)         | 42 (8.9%)                          | 76 (6.8%)       | 0.261                    |
| Cardiovascular disease            | 92 (5.4%)                   | 33 (5.5%)           | 9 (7.1%)         | 24 (5.1%)                          | 59 (5.3%)       | 0.871                    |

|                                                         |                    |                    |            |             |                    |       |
|---------------------------------------------------------|--------------------|--------------------|------------|-------------|--------------------|-------|
| Chronic respiratory condition                           | 129 (7.5%)         | 49 (8.2%)          | 10 (7.9%)  | 39 (8.2%)   | 80 (7.2%)          | 0.473 |
| Depression                                              | 141 (8.2%)         | 64 (10.6%)         | 11 (8.7%)  | 53 (11.2%)  | 77 (6.9%)          | 0.007 |
| Diabetes (type 1 or 2)                                  | 224 (13.1%)        | 77 (12.8%)         | 15 (11.8%) | 62 (13.1%)  | 147 (13.2%)        | 0.811 |
| Dyslipidemia                                            | 273 (15.9%)        | 101 (16.8%)        | 21 (16.5%) | 80 (16.9%)  | 172 (15.5%)        | 0.470 |
| Fibromyalgia                                            | 124 (7.2%)         | 51 (8.5%)          | 10 (7.9%)  | 41 (8.6%)   | 73 (6.6%)          | 0.143 |
| Fragility fracture                                      | 5 (0.3%)           | 1 (0.2%)           | 1 (0.8%)   | 0 (0.0%)    | 4 (0.4%)           | 0.479 |
| Hypertension                                            | 439 (25.6%)        | 175 (29.1%)        | 34 (26.8%) | 141 (29.7%) | 264 (23.7%)        | 0.015 |
| Low back pain                                           | 194 (11.3%)        | 65 (10.8%)         | 12 (9.4%)  | 53 (11.2%)  | 129 (11.6%)        | 0.624 |
| Malignancy                                              | 49 (2.9%)          | 14 (2.3%)          | 2 (1.6%)   | 12 (2.5%)   | 35 (3.1%)          | 0.332 |
| Osteoarthritis                                          | 311 (18.2%)        | 121 (20.1%)        | 18 (14.2%) | 103 (21.7%) | 190 (17.1%)        | 0.118 |
| Osteoporosis                                            | 19 (1.1%)          | 3 (0.5%)           | 0 (0.0%)   | 3 (0.6%)    | 16 (1.4%)          | 0.076 |
| Psoriasis                                               | 930 (54.3%)        | 347 (57.7%)        | 67 (52.8%) | 280 (59.1%) | 583 (52.4%)        | 0.035 |
| <b>Medications, N (%)</b>                               |                    |                    |            |             |                    |       |
| Biologic DMARD                                          | 83 (4.8%)          | 27 (4.5%)          | NR         | NR          | 56 (5.0%)          | 0.617 |
| Targeted synthetic DMARD                                | 0 (0.0%)           | 0 (0.0%)           | NR         | NR          | 0 (0.0%)           | 0.996 |
| Conventional DMARD                                      | 799 (46.6%)        | 305 (50.7%)        | NR         | NR          | 494 (44.4%)        | 0.012 |
| Glucocorticoid                                          | 794 (46.4%)        | 310 (51.6%)        | NR         | NR          | 484 (43.5%)        | 0.001 |
| Antidepressant                                          | 514 (30.0%)        | 176 (29.3%)        | NR         | NR          | 338 (30.4%)        | 0.632 |
| Antidiabetic                                            | 191 (11.2%)        | 67 (11.1%)         | NR         | NR          | 124 (11.2%)        | 0.999 |
| Antihyperlipidemic                                      | 398 (23.2%)        | 135 (22.5%)        | NR         | NR          | 263 (23.7%)        | 0.578 |
| Antihypertensive                                        | 614 (35.8%)        | 226 (37.6%)        | NR         | NR          | 388 (34.9%)        | 0.264 |
| Pain medication                                         | 1003 (58.6%)       | 374 (62.2%)        | NR         | NR          | 629 (56.6%)        | 0.023 |
| Opioid                                                  | 569 (33.2%)        | 208 (34.6%)        | NR         | NR          | 361 (32.5%)        | 0.368 |
| NSAID                                                   | 729 (42.6%)        | 280 (46.6%)        | NR         | NR          | 449 (40.4%)        | 0.013 |
| Other pain medication                                   | 243 (14.2%)        | 84 (14.0%)         | NR         | NR          | 159 (14.3%)        | 0.855 |
| <b>Healthcare utilization and costs PPPY, mean (SD)</b> |                    |                    |            |             |                    |       |
| Inpatient admissions                                    | 2.2 (0.5)          | 2.4 (0.8)          | NR         | NR          | 2.1 (0.3)          | 0.038 |
| Emergency room visits                                   | 2.6 (1.1)          | 2.6 (1.0)          | NR         | NR          | 2.6 (1.2)          | 0.900 |
| Rheumatologist office visits                            | 3.0 (1.7)          | 3.1 (1.7)          | NR         | NR          | 3.0 (1.6)          | 0.423 |
| Total healthcare costs                                  | \$8,958 (\$20,447) | \$9,109 (\$25,020) | NR         | NR          | \$8,877 (\$17,497) | 0.823 |

Notes: <sup>a</sup>with or without PA. Abbreviations: CDHP, consumer driven health plan; DCI, Deyo-Charlson Comorbidity Index; DMARD, disease-modifying antirheumatic drug; EPO, exclusive provider organization; HDHP, high-deductible health plan; HMO, health maintenance organization; NR, not reported; NSAID, nonsteroidal anti-inflammatory drug; PA, prior authorization; POS, point of service; PPO, preferred provider organization; PPPY, per-person per-year
